# Supplementary material for: Ultra-fast hydrothermal synthesis of diastereoselective pure ethenylene-bridged periodic mesoporous organosilicas
Source: Royal Society of Chemistry journal article supplement (doi:10.1039/b705412b), 2007-01-01

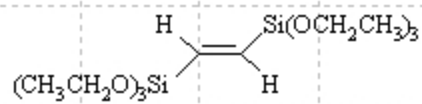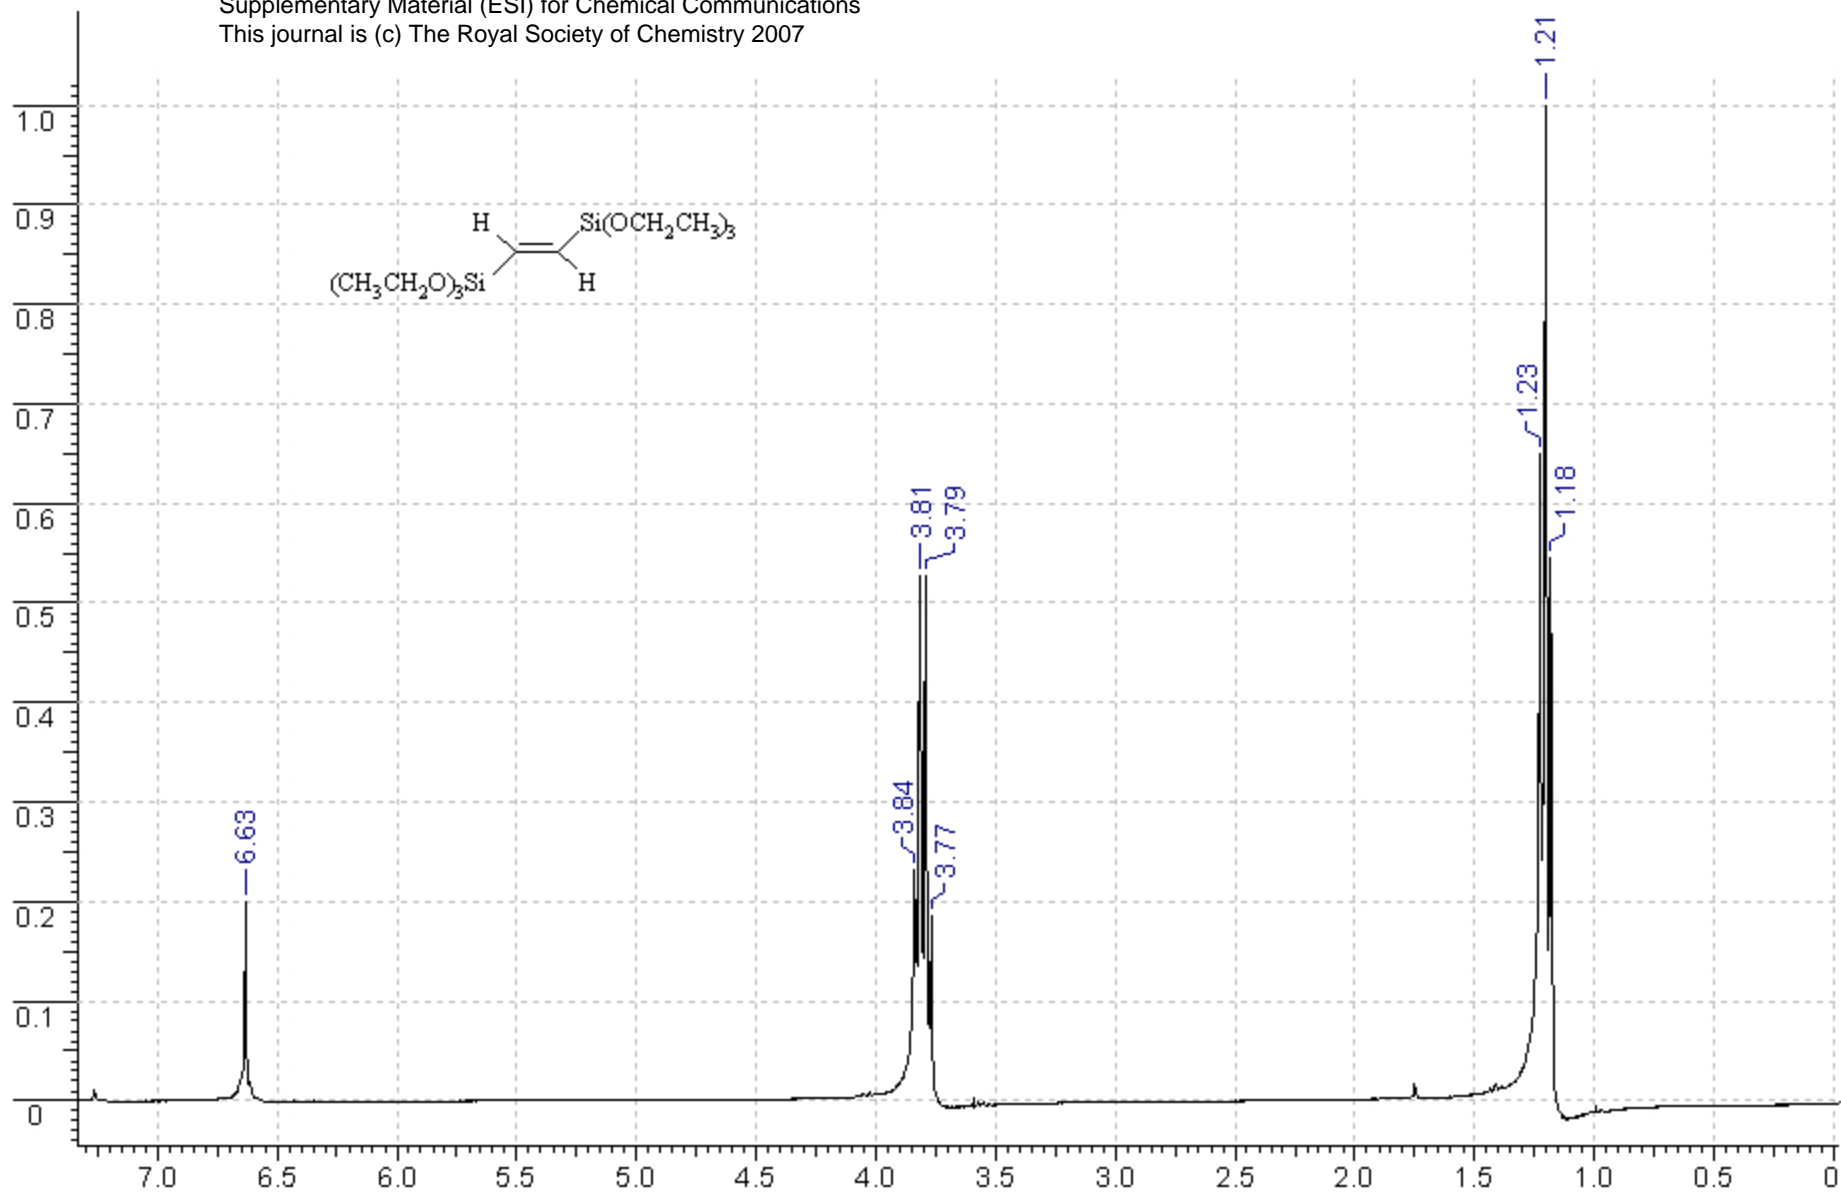

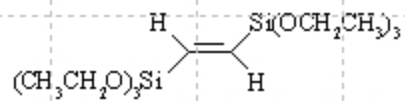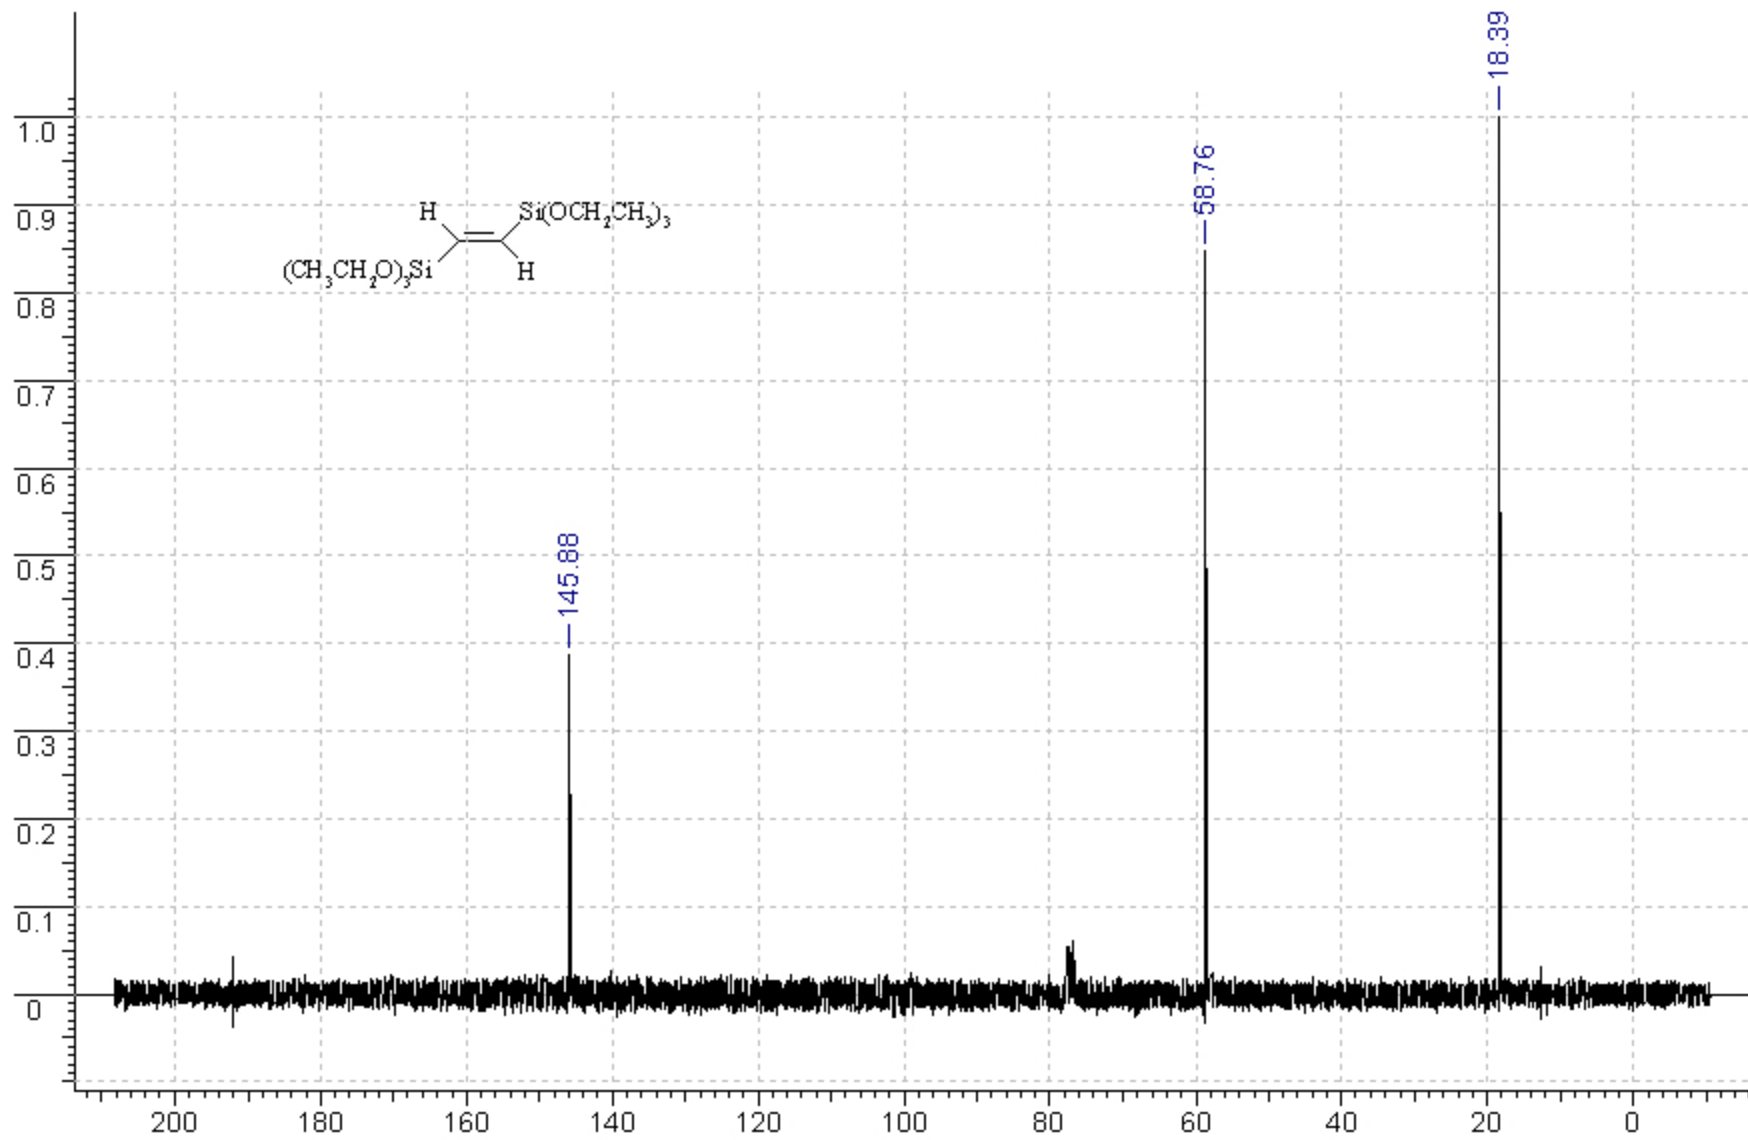

## Raman spectra of ethenylene-bridged PMO's

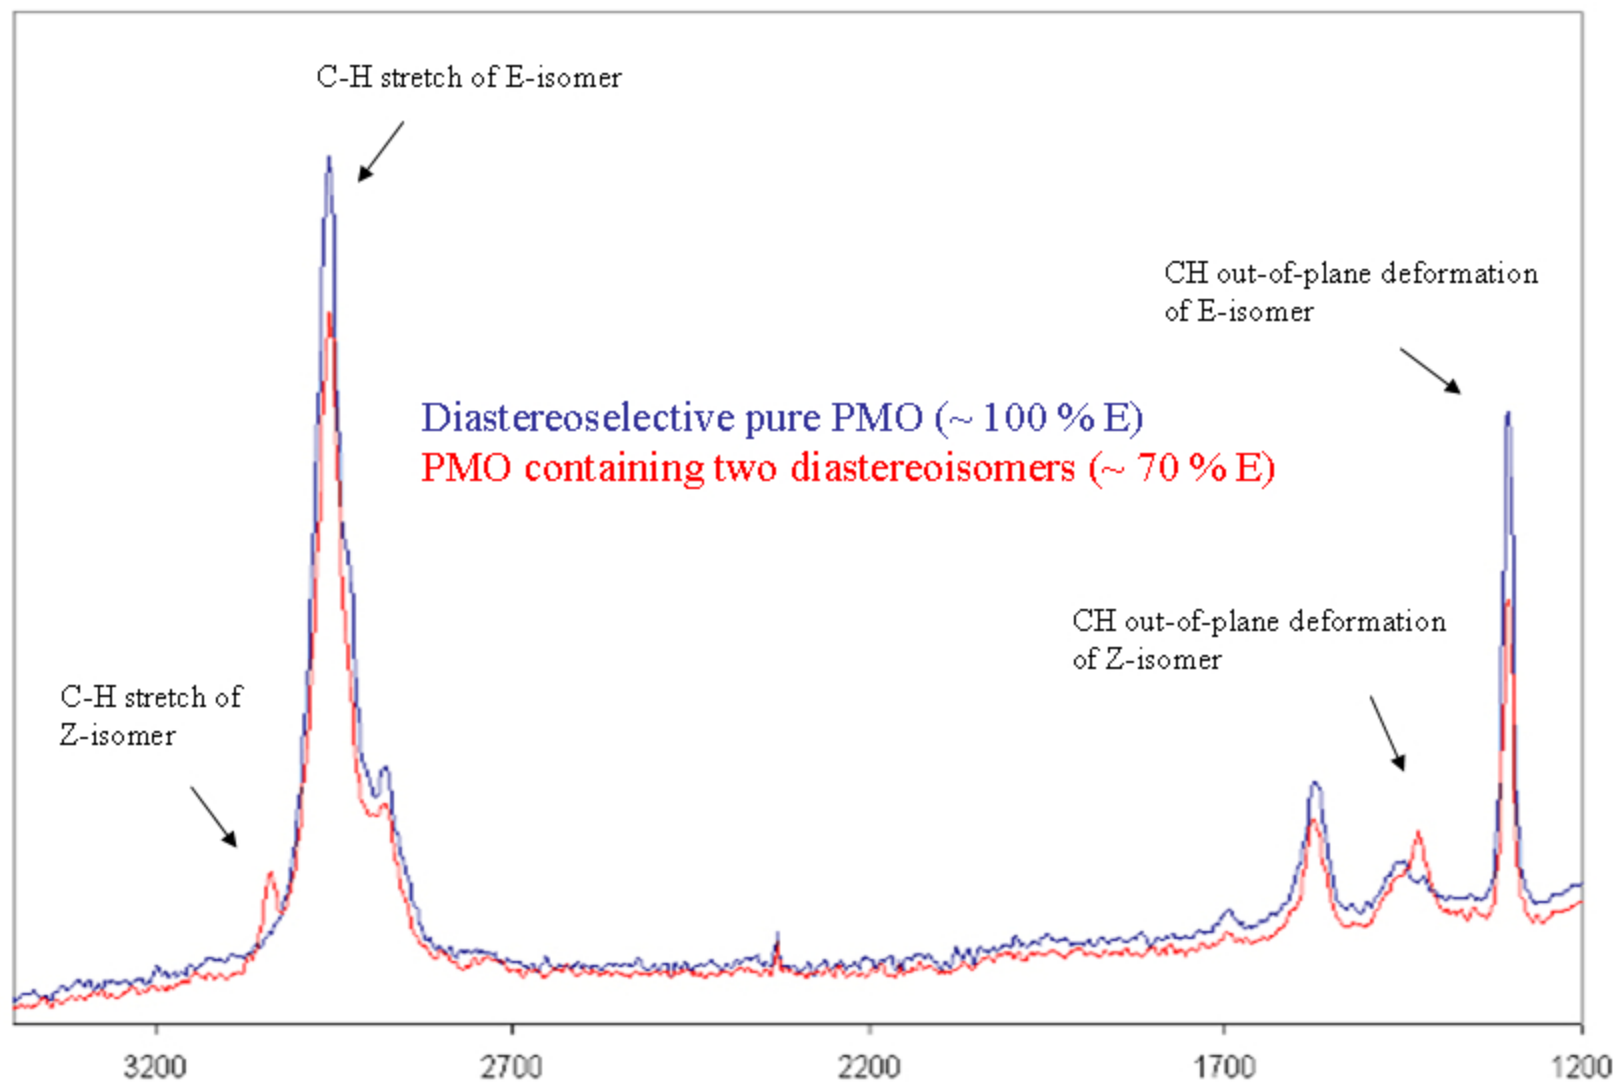

### Influence of the pH on the surface area and the total pore volume of ethenylene-bridged PMO's synthesized in the absence of BuOH

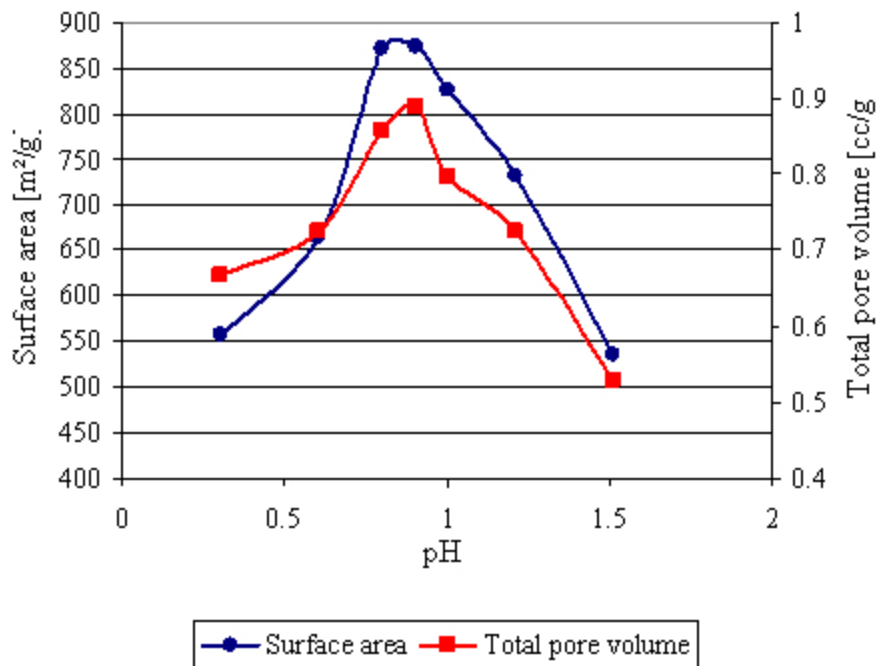

### Influence of BuOH on the ordering of ethenylene-bridged PMO's

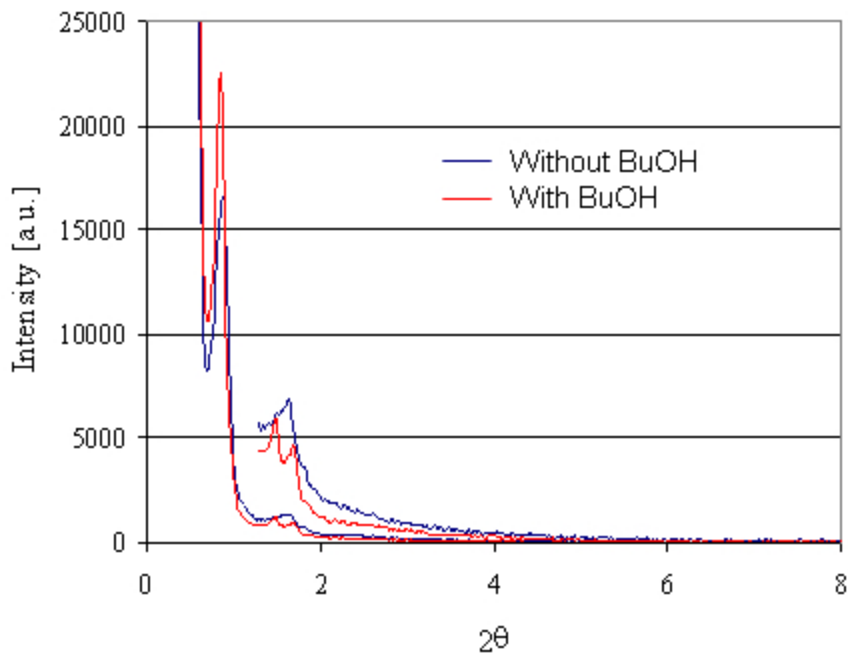

Supplement: b705412b.pdf [file b705412b.pdf]
